# Supplementary material for: Spin state engineered ZnxCo3−xO4 as an efficient oxygen evolution electrocatalyst
Source: Royal Society of Chemistry journal article supplement (doi:10.1039/c8cp06641h), 2018-01-01
Supplement: c8cp06641h1.pdf [file c8cp06641h1.pdf]

## Supporting Information

# Spin state engineered $\text{Zn}_x\text{Co}_{3-x}\text{O}_4$ as efficient oxygen evolution electrocatalyst

*Rani Mohan Ramsundar,<sup>a,c</sup> Vijayamohanan Kunjukrishna Pillai<sup>b,c</sup> and Pattayil Alias Joy \*<sup>a,c</sup>*

*<sup>a</sup>Physical and Materials Chemistry Division, CSIR-National Chemical Laboratory, Pune 411008, India*

*<sup>b</sup>CSIR-Central Electrochemical Research Institute, Karaikudi 630006, India*

*<sup>c</sup>Academy of Scientific and Innovative Research (AcSIR), Ghaziabad 201002, India*

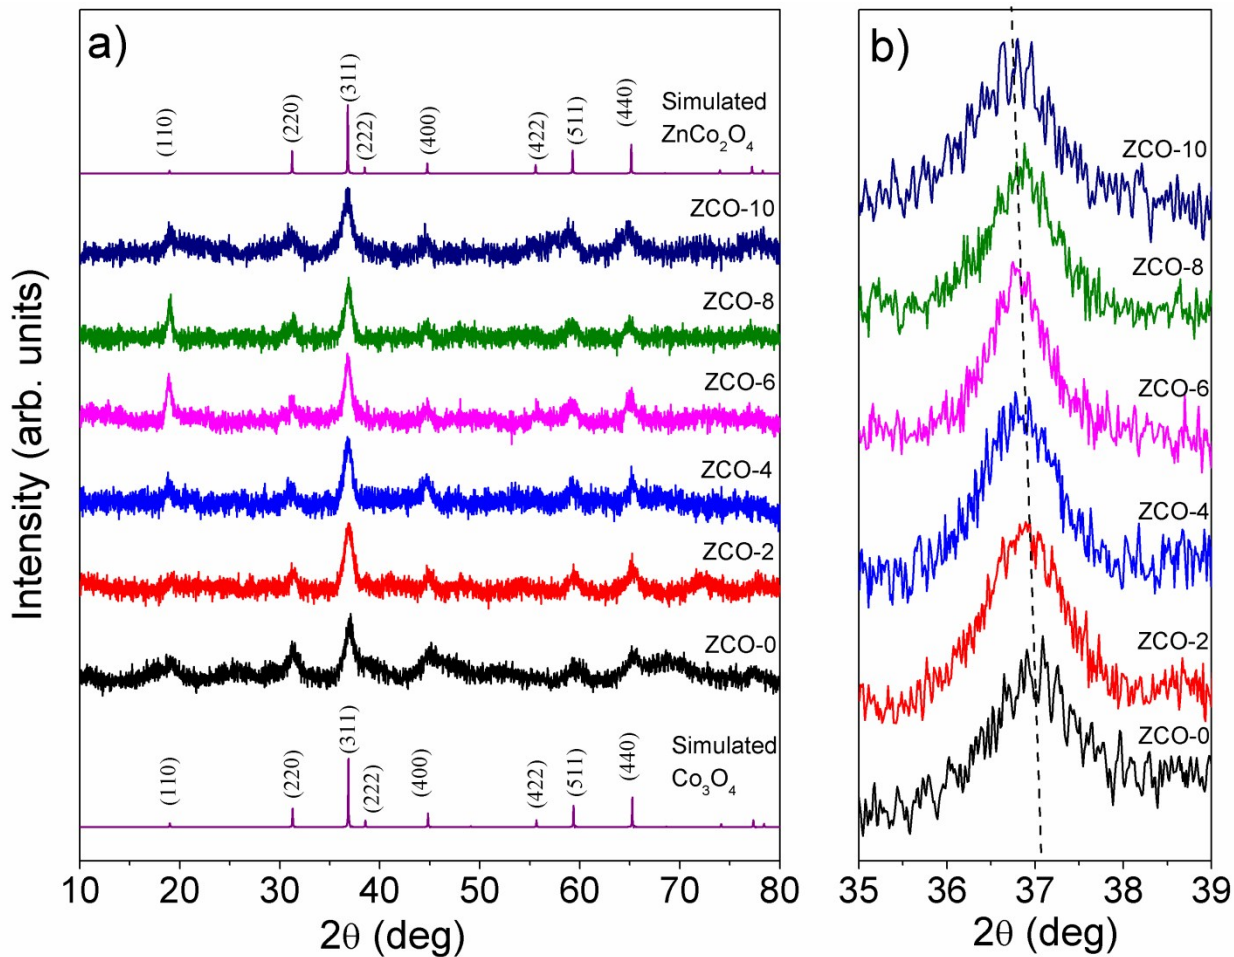

**Fig. S1.** (a) XRD patterns of the unsubstituted and Zn-substituted cobalt oxide compositions compared with the simulated patterns of the end members, and (b) magnified view of the (311) peak in the XRD patterns. The broken line in (b) indicates the small shift in the position of the peak to lower angles.

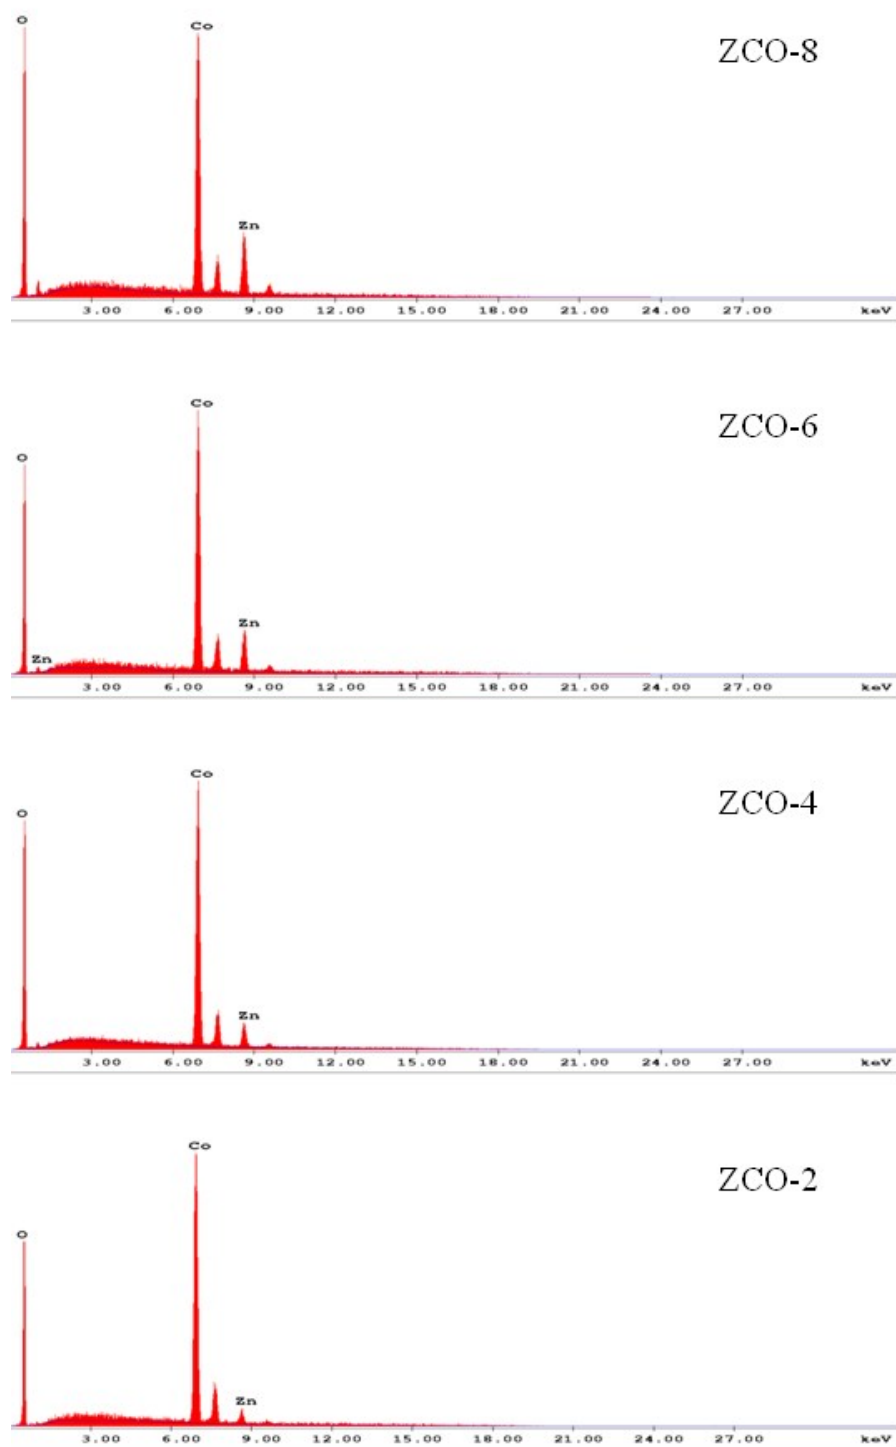

**Fig. S2.** EDX data of different compositions in  $Zn_xCo_{3-x}O_4$

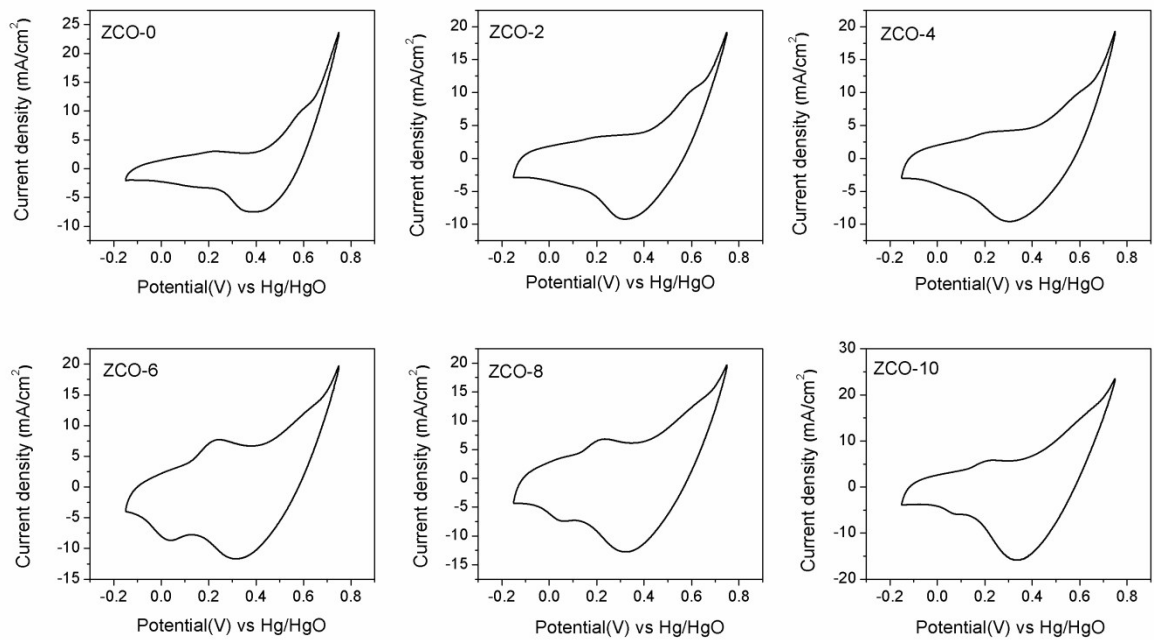

**Fig. S3.** Cyclic voltammetry curves of Zn<sub>x</sub>Co<sub>3-x</sub>O<sub>4</sub> in 0.1 M KOH, recorded at the scan rate of 50 mV/s

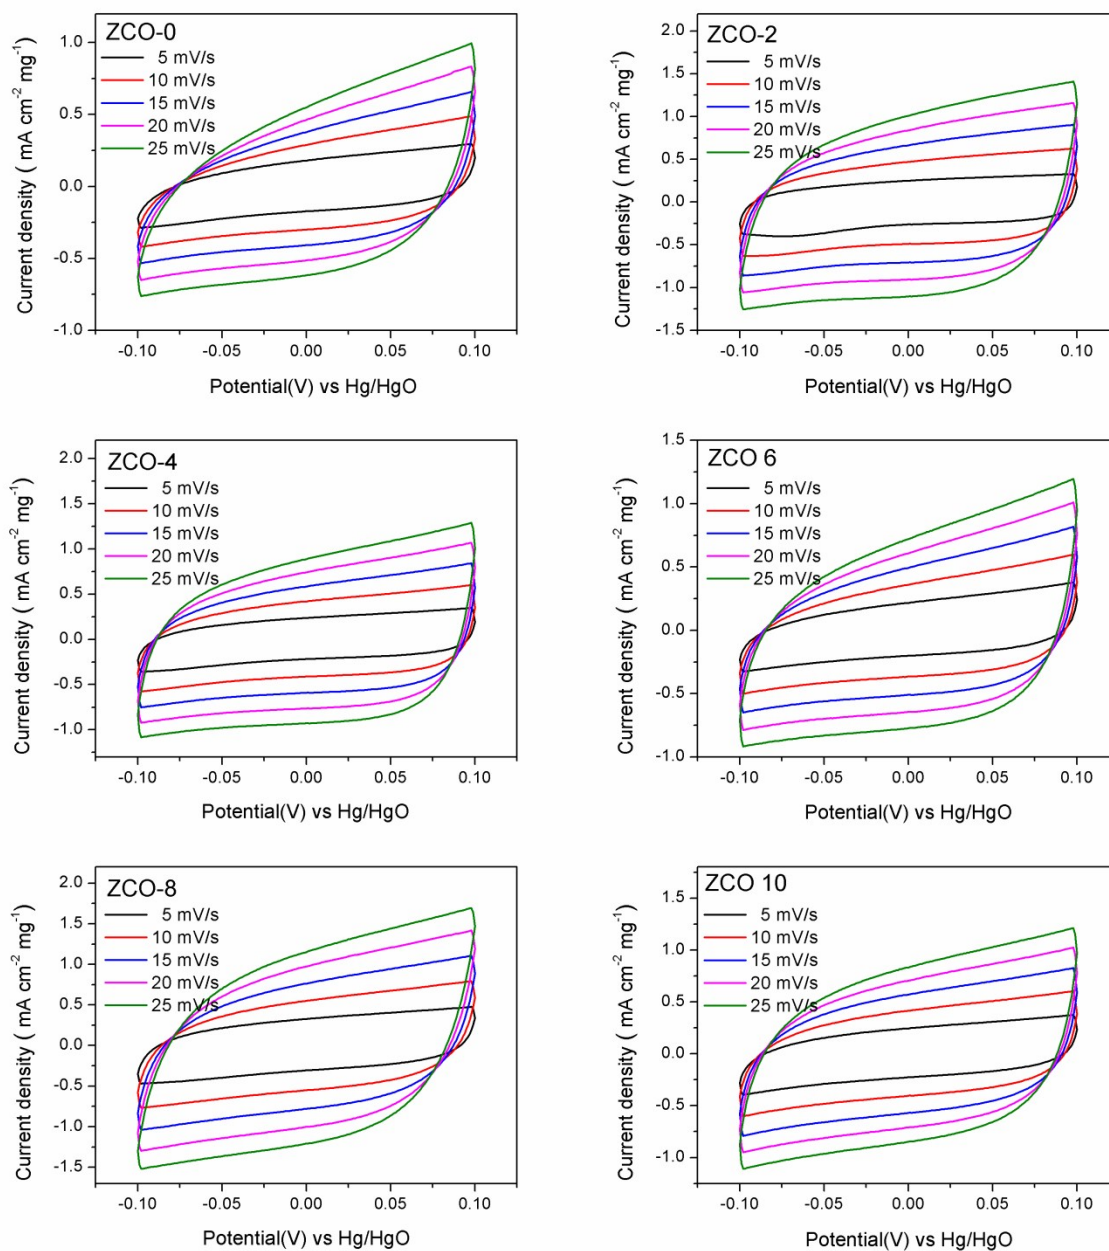

**Fig. S4.** Cyclic voltammety curves of  $\text{Zn}_x\text{Co}_{3-x}\text{O}_4$  in 0.1 M KOH at different scan rates in the non-Faradic potential window (-0.1 to 0.1 V)

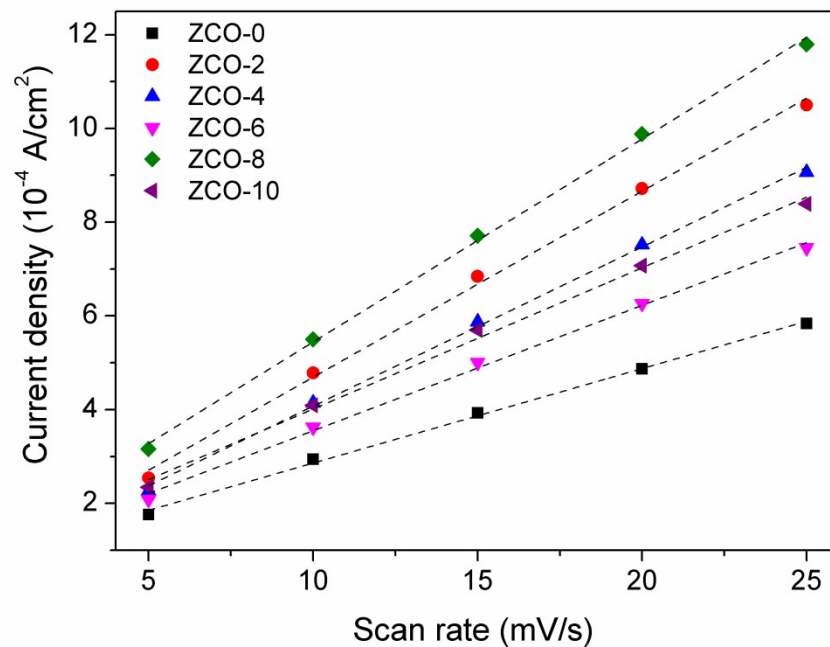

**Fig. S5.** Capacitive current density as a function of scan rate of  $Zn_xCo_{3-x}O_4$

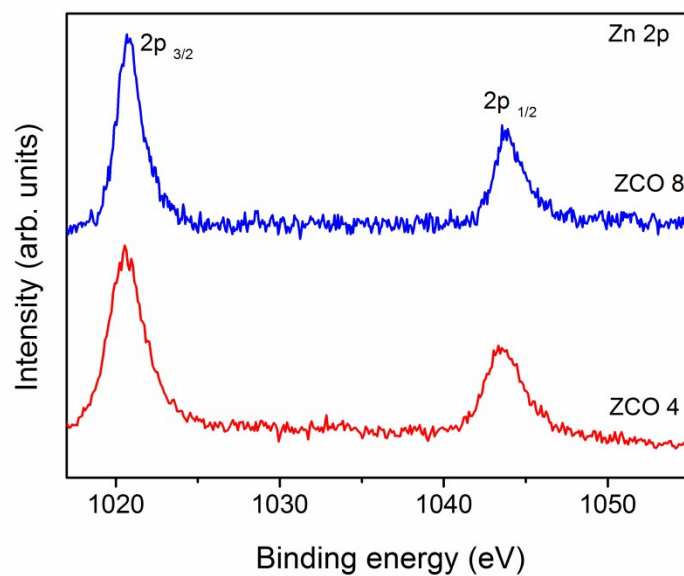

**Fig. S6.** Zn 2p XPS spectra of  $Zn_xCo_{3-x}O_4$

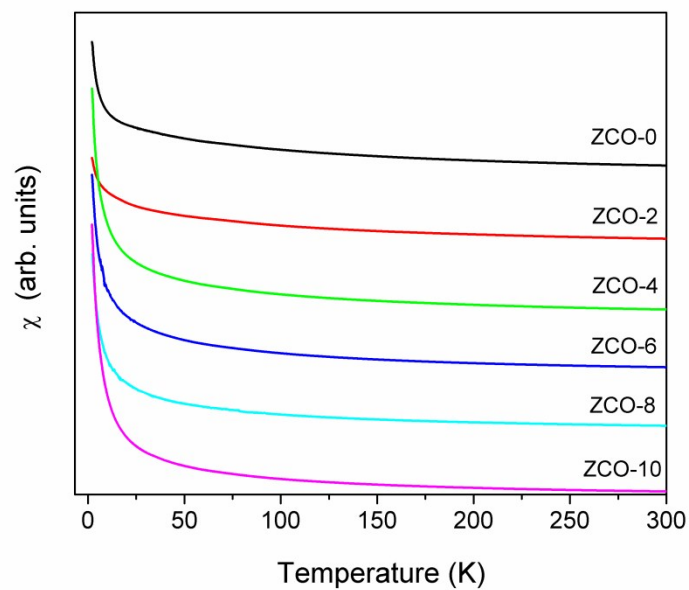

**Fig. S7.** DC magnetic susceptibility curves of  $\text{Zn}_x\text{Co}_{3-x}\text{O}_4$ . The curves are shifted along the  $y$ -axis.

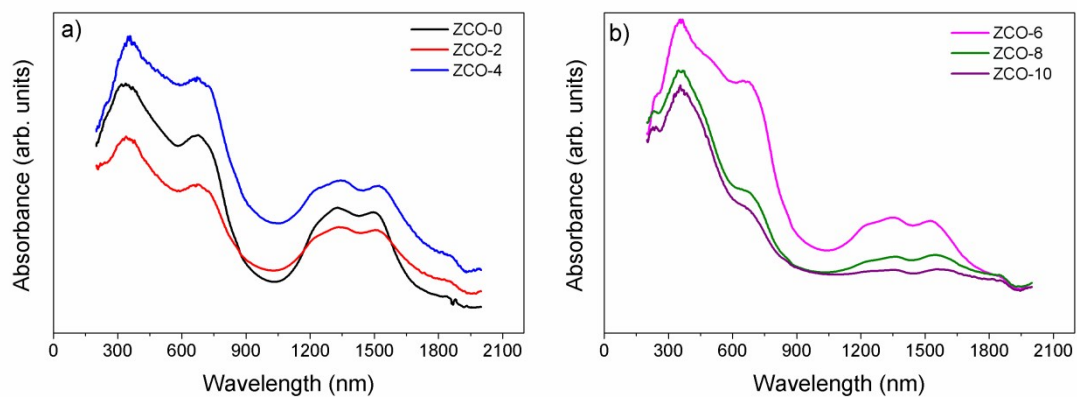

**Fig. S8. (a,b)** Electronic absorption spectra of  $\text{Zn}_x\text{Co}_{3-x}\text{O}_4$  without baseline correction

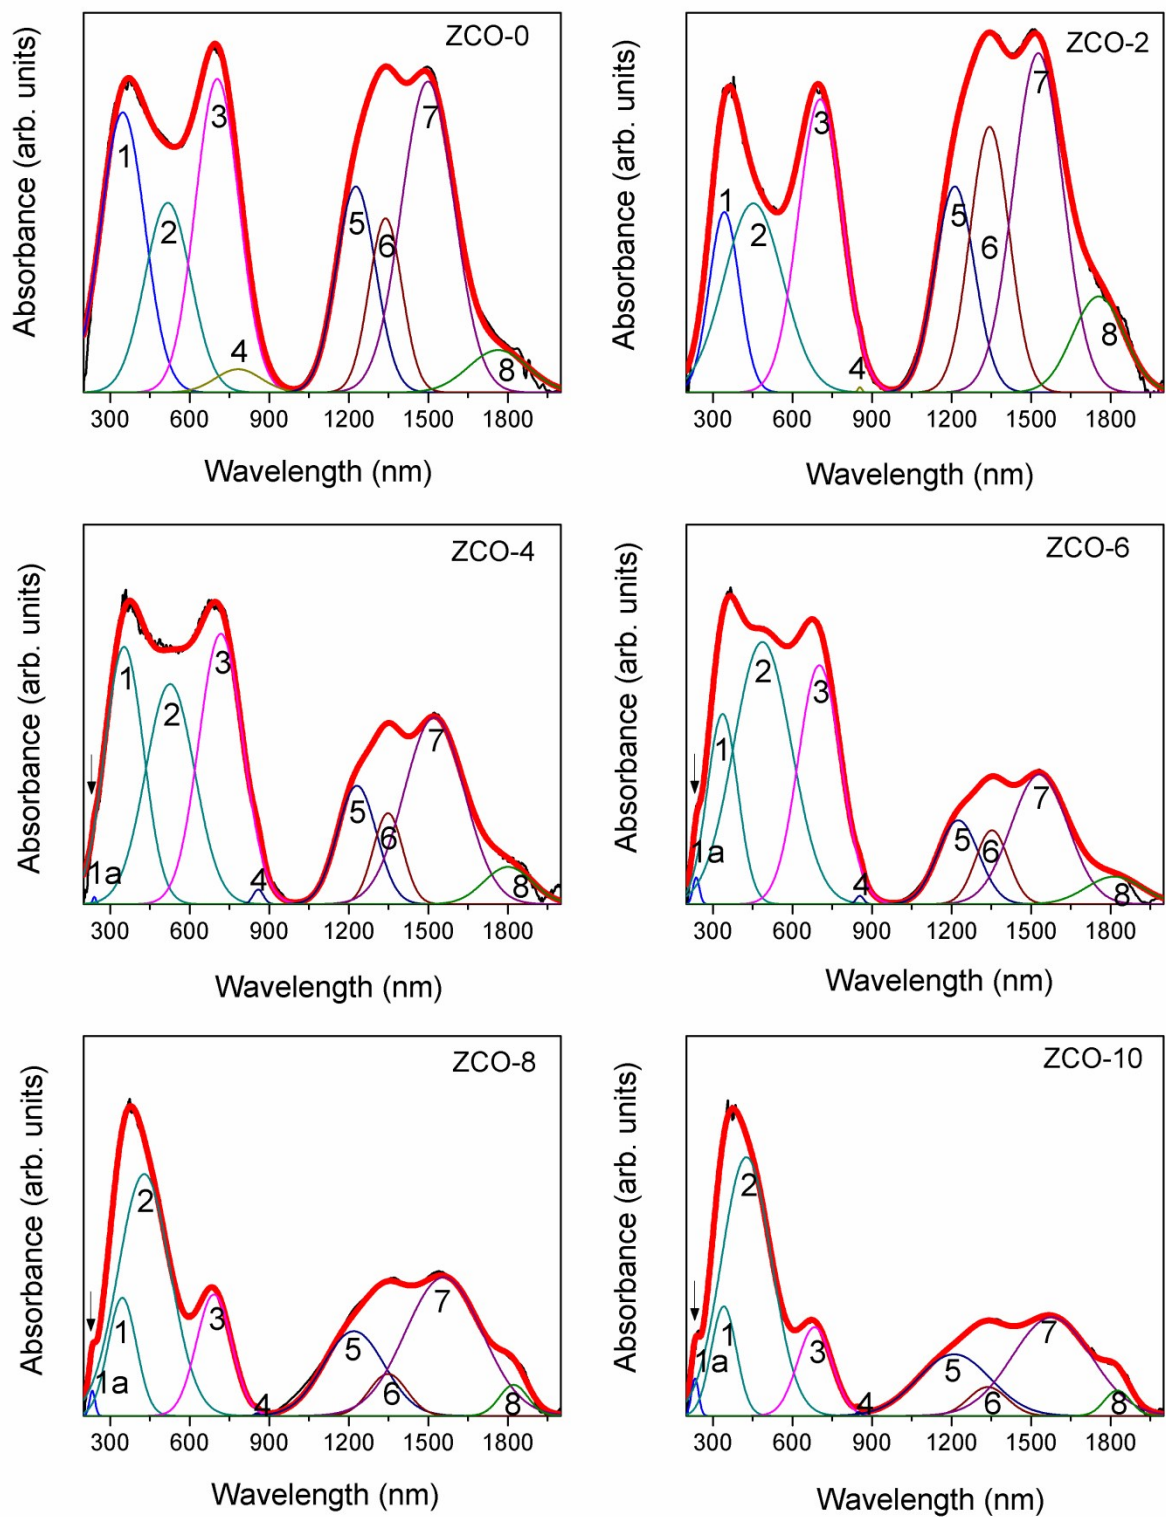

**Fig. S9.** Deconvoluted absorption spectra of  $Zn_xCo_{3-x}O_4$  (peak-1a is present only from  $x=0.4$  to  $x=1$  in  $Zn_xCo_{3-x}O_4$  and it is indicated by the arrow mark).



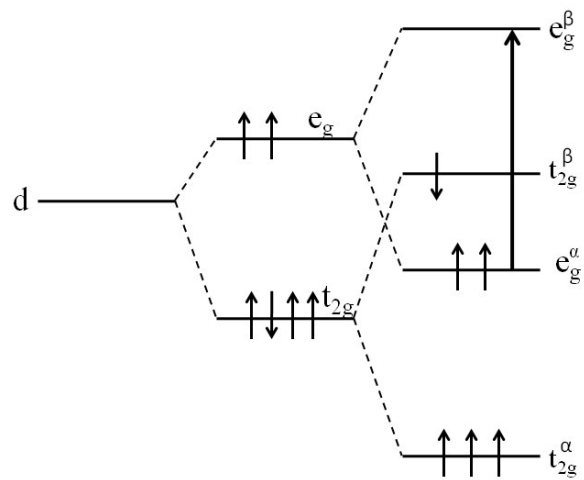

**Fig. S10.** 3d-energy levels splitting of high spin  $\text{Co}^{3+}$  [1]

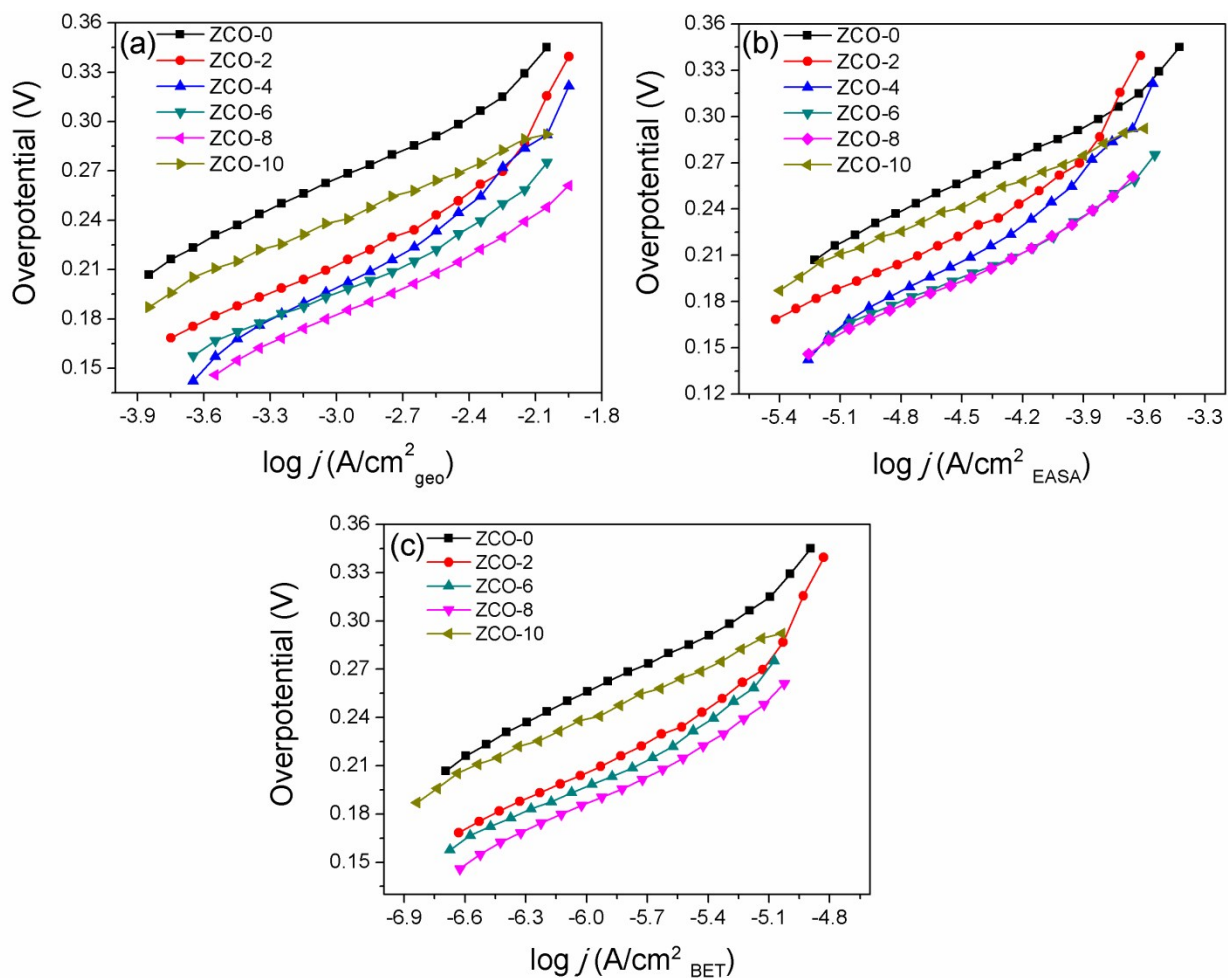

**Fig. S11** Tafel plots of OER activities of Zn<sub>x</sub>Co<sub>3-x</sub>O<sub>4</sub> normalized by (a) geometrical surface area of the electrode, (b) electrochemically active surface area (EASA), and (c) Brunauer-Emmett-Teller (BET) surface area.

**Table S1.** Lattice parameter and crystallite size of  $Zn_xCo_{3-x}O_4$ 

| Sample code | Composition           | Lattice parameter<br>a (Å) | Crystallite size<br>(±1 nm) |
|-------------|-----------------------|----------------------------|-----------------------------|
| ZCO-0       | $Co_3O_4$             | 8.075                      | 7                           |
| ZCO-2       | $Zn_{0.2}Co_{2.8}O_4$ | 8.090                      | 6                           |
| ZCO-4       | $Zn_{0.4}Co_{2.6}O_4$ | 8.084                      | 11                          |
| ZCO-6       | $Zn_{0.6}Co_{2.4}O_4$ | 8.108                      | 12                          |
| ZCO-8       | $Zn_{0.8}Co_{2.2}O_4$ | 8.116                      | 10                          |
| ZCO-10      | $ZnCo_2O_4$           | 8.143                      | 11                          |

**Table S2.** Elemental composition from EDX

| Sample code | Composition           | Theoretical<br>Zn/Co ratio | Experimental<br>Zn/Co ratio from |
|-------------|-----------------------|----------------------------|----------------------------------|
| ZCO-2       | $Zn_{0.2}Co_{2.8}O_4$ | 0.0714                     | 0.0720                           |
| ZCO-4       | $Zn_{0.4}Co_{2.6}O_4$ | 0.1538                     | 0.1515                           |
| ZCO-6       | $Zn_{0.6}Co_{2.4}O_4$ | 0.2500                     | 0.2587                           |
| ZCO-8       | $Zn_{0.8}Co_{2.2}O_4$ | 0.3636                     | 0.3631                           |

**Table S3.** Comparisons of the ratios of  $Co^{2+}/Co^{3+}$  obtained from the XPS spectra

| Sample name                     | $Co^{2+}/Co^{3+}$ | Expected ratio |
|---------------------------------|-------------------|----------------|
| ZCO-0 ( $Co_3O_4$ )             | 0.49              | 0.5            |
| ZCO-4 ( $Zn_{0.4}Co_{2.6}O_4$ ) | 0.31              | 0.3            |
| ZCO-8 ( $Zn_{0.8}Co_{2.2}O_4$ ) | 0.11              | 0.1            |

**Table S4.** Curie constant and spin values of  $Zn_xCo_{3-x}O_4$  from the magnetic studies.

| Sample code | Curie constant<br>(emu K mol <sup>-1</sup> ) | Total spin | Spin contribution<br>from Co <sup>3+</sup> |
|-------------|----------------------------------------------|------------|--------------------------------------------|
| ZCO-0       | 2.87                                         | 1.94       | 0.45                                       |
| ZCO-2       | 2.48                                         | 1.79       | 0.59                                       |
| ZCO-4       | 2.20                                         | 1.66       | 0.77                                       |
| ZCO-6       | 2.05                                         | 1.58       | 0.99                                       |
| ZCO-8       | 1.55                                         | 1.34       | 1.04                                       |
| ZCO-10      | 1.58                                         | 1.35       | 1.35                                       |

**Table S5.** Assignments of the transitions for the deconvoluted peaks in the absorption spectra of  $Zn_xCo_{3-x}O_4$ . The references in the brackets refer to the references in the main manuscript.

| No      | Energy of the bands |               | Transition                                                                            | References  |
|---------|---------------------|---------------|---------------------------------------------------------------------------------------|-------------|
|         | in eV               | in nm         |                                                                                       |             |
| Peak 1  | 3.70 – 3.46         | 334-359       | LMCT O <sup>2-</sup> → Co <sup>2+</sup>                                               | 2 [47]      |
| Peak 1a | 5.17-5.33           | 233-240       | LMCT O <sup>2-</sup> → Zn <sup>2+</sup>                                               | 3,4 [50,51] |
| Peak 2  | 2.77 – 2.44         | 446- 506      | Co <sup>3+</sup> (H.S) d-d<br>$\sigma^* e_g^\alpha \rightarrow \sigma^* e_g^\beta Co$ | 1 [52]      |
| Peak 3  | 1.8 – 1.75          | 691.5 – 709.4 | $t_{2g}(Co^{3+}) \rightarrow t_2(Co^{2+})$                                            | 5 [48]      |
| Peak 4  | 1.47 – 1.44         | 844 – 863     | Due to some electronic<br>defects by oxygen vacancies                                 | 2 [47]      |
| Peak 5  | 1 -1.02             | 1232 - 1219   | Co <sup>2+</sup> $\pi^2 t_2 \rightarrow Co^{3+} \sigma^* e$                           | 5 [48]      |
| Peak 6  | 0.925 -<br>0.912    | 1339.3 – 1360 | Co <sup>2+</sup> → $e_g^* Co^{3+}$                                                    | 5 [48]      |
| Peak 7  | 0.825 - 0.78        | 1503 - 1588   | Co <sup>2+</sup> $\pi^* e \rightarrow \pi^* t_2$                                      | 5 [48]      |

**Table S6.** BET surface area of  $Zn_xCo_{3-x}O_4$ 

| Sample code | BET surface area (m <sup>2</sup> /g) |
|-------------|--------------------------------------|
| ZCO-0       | 70                                   |
| ZCO-2       | 76                                   |
| ZCO-6       | 106                                  |
| ZCO-8       | 119                                  |
| ZCO-10      | 97                                   |

**Table S7.** Overpotential values of  $Zn_xCo_{3-x}O_4$  based on the current density normalized by geometrical surface area, electrochemically active surface area (EASA) and Brunauer–Emmett–Teller (BET) surface area, calculated from Fig. S11

| Sample code | Overpotential (mV) at $1.0 \times 10^{-2}$ A/cm <sup>2</sup> (Geometrical surface area) | Overpotential (mV) at $1.0 \times 10^{-4}$ A/cm <sup>2</sup> (EASA) | Overpotential (mV) at $6.3 \times 10^{-6}$ A/cm <sup>2</sup> (BET surface area) |
|-------------|-----------------------------------------------------------------------------------------|---------------------------------------------------------------------|---------------------------------------------------------------------------------|
| ZCO-0       | 358                                                                                     | 287                                                                 | 307                                                                             |
| ZCO-2       | 325                                                                                     | 264                                                                 | 264                                                                             |
| ZCO-4       | 306                                                                                     | 250                                                                 | -                                                                               |
| ZCO-6       | 287                                                                                     | 226                                                                 | 256                                                                             |
| ZCO-8       | 254                                                                                     | 226                                                                 | 241                                                                             |
| ZCO-10      | 300                                                                                     | 270                                                                 | 285                                                                             |

**References:**

1. I. D. Belova, Y. E. Roginskaya, R. R. Shifrina, S. G. Gagarin, Y. V. Plekhanov and Y. N. Venevtsev, *Solid State Commun.*, 1983, **47**, 577-584.
2. M. Lenglet and C. K. Jørgensen, *Chem. Phys. Lett.*, 1994, **229**, 616-620.

3. S. K. Sampath and J. F. Cordaro, *J. Am. Ceram. Soc.*, 1998, 81, 649-654.
4. C. R. Mariappan, R. Kumar and G. V. Prakash, *RSC Adv.*, 2015, 5, 26843-26849.  
K. Miedzinska, B. Hollebone and J. Cook, *J. Phys. Chem. Solids*, 1987, **48**, 649-656.
